# Supplementary material
Source: PubMed Central journal article supplement (PMC1838593)

**(A) Belongs to the CDP-alcohol phosphatidyltransferase class-I family.**

1. **PIS1\_ARATH** [*Arabidopsis thaliana* (thale cress)]
2. **CDIPT\_HUMAN** [*Homo sapiens* (human)]
3. **PIS\_YEAST** [*Saccharomyces cerevisiae* (baker's yeast)]  
CDP-diacylglycerol--inositol 3-phosphatidyltransferase 1  
(Phosphatidylinositol synthase 1) (PtdIns synthase 1) (PI synthase1) (AtPIS1). (**EC 2.7.8.11**)  
**FUNCTION:** Catalyzes the biosynthesis of phosphatidylinositol (PtdIns) as well as PtdIns:inositol exchange reaction. May thus act to reduce an excessive cellular PtdIns content. The exchange activity is due to the reverse reaction of PtdIns synthase and is dependent on CMP, which is tightly bound to the enzyme.  
**CATALYTIC ACTIVITY:** CDP-diacylglycerol + myo-inositol = CMP + phosphatidyl-1D-myo-inositol.  
**SUBCELLULAR LOCATION:** Membrane; multi-pass membrane protein. [5 TMSs]  
**INDUCTION:** Inhibited by PtdIns (product inhibition), phosphatidylinositol phosphate, and nucleoside di- and tri-phosphates.
4. **PGSA\_ECOLI** [*Escherichia coli*]
5. **PGSA\_BACSU** [*Bacillus subtilis*]
6. **PGSA\_HAEIN** [*Haemophilus influenzae*]  
CDP-diacylglycerol--glycerol-3-phosphate 3-phosphatidyltransferase  
(Phosphatidylglycerophosphate synthase) (PGP synthase). (**EC 2.7.8.5**)  
**FUNCTION:** This protein catalyzes the committed step to the synthesis of the acidic phospholipids.  
**CATALYTIC ACTIVITY:**  
CDP-diacylglycerol + sn-glycerol 3-phosphate = CMP + 3(3-sn-phosphatidyl)-sn-glycerol 1-phosphate.  
**PATHWAY:** Acidic phospholipids biosynthesis.  
**SUBCELLULAR LOCATION:** Bacterial cell inner membrane; multi-pass membrane protein. [4 TMSs]
7. **PSS\_BACSU** [*Bacillus subtilis*]
8. **PSS\_YEAST** [*Saccharomyces cerevisiae* (baker's yeast)]  
CDP-diacylglycerol--serine O-phosphatidyltransferase  
(Phosphatidylserine synthase). (**EC 2.7.8.8**)  
**CATALYTIC ACTIVITY:** CDP-diacylglycerol + L-serine = CMP + 3-O-sn-phosphatidyl-L-serine.  
**PATHWAY:** Biosynthesis of phosphatidylcholine (Bremer-Greenberg pathway); committed step.  
**SUBCELLULAR LOCATION:** Membrane; multi-pass membrane protein.
9. **CPT1\_YEAST** [*Saccharomyces cerevisiae* (baker's yeast)]  
Diacylglycerol cholinephosphotransferase  
(SN-1,2-diacylglycerol cholinephosphotransferase) (CHOPT). (**EC 2.7.8.2**)  
**FUNCTION:** Involved in protein-dependent process of phospholipid transport to distribute phosphatidyl choline to the luminal surface. The multiple transmembrane domains and luminal hydrophilic domains of the cholinephosphotransferase might participate in the transport process.  
**CATALYTIC ACTIVITY:** CDP-choline + 1,2-diacylglycerol = CMP + a phosphatidylcholine.  
**ENZYME REGULATION:** Requires a divalent cation activator, and is inhibited by CMP.  
**SUBCELLULAR LOCATION:** Membrane; multi-pass membrane protein.
10. **EPT1\_YEAST** [*Saccharomyces cerevisiae* (Baker's yeast)]  
Ethanolaminephosphotransferase (**EC 2.7.8.1**) (ETHPT)  
**FUNCTION:** Involved in protein-dependent process of phospholipid transport to distribute phosphatidyl ethanolamine to the luminal surface. The multiple transmembrane domains and luminal hydrophilic domains of the ethanolaminephosphotransferase might participate in the transport process. EPT1 catalyzes both choline- and ethanolamine-phosphotransferase reactions.  
**CATALYTIC ACTIVITY:** CDP-ethanolamine + 1,2-diacylglycerol = CMP + a phosphatidylethanolamine

**(B) Multiple alignment of the predicted DIP synthases and other characterized proteins from the CDP-alcohol phosphatidyltransferase class-I family.**

**DIPS signature**

|             |                    |   |  |  |           |           |           |          |            |           |             |           |          |                    |
|-------------|--------------------|---|--|--|-----------|-----------|-----------|----------|------------|-----------|-------------|-----------|----------|--------------------|
| TM_DIPS     |                    |   |  |  | <b>DG</b> | <b>sr</b> | <b>NR</b> | <b>s</b> |            |           | <b>tPnq</b> |           |          |                    |
| Tnea_DIPS   |                    |   |  |  | MLRKST    | DGWIS     | SSLINRRFS | SRITN    | -LILEKNWQI | TPNQ      | MSFIS       | SFLVGVLA  | FPFYLLK  | ----               |
| APE1516     |                    |   |  |  | MLRKTT    | DGWIS     | SSLNRRIS  | STRITN   | -FILKRNWNV | TPNQ      | MSFVS       | FLLGMI    | AFFPYLIK | ----               |
| GZ13E1_32   | (227aa of IMPCT)   | - |  |  | MTVWRS    | SWRLG     | VGSGD     | KPTD     | CGPV       | SRFLNRRIS | IASAIA      | -AIALNLPL | TPNMLSLI | SFLTAAAAALFIAGG    |
| Rxy1021259  | (220aa of IMPCT)   | - |  |  | KKA       | EKLLQG    | -DLAKSD   | DGLI     | SRHINREFS  | TRIF      | TPLLLK      | MHRGI     | TPNQ     | VSILSFIIGLISL      |
| 17H9-22     | (226aa of IMPCT)   | - |  |  | RLSE      | EMVLG     | -WAAS     | GNDCPV   | SRHINRRIS  | SRITR     | ---         | RLDDTP    | PLSDQ    | VSLLSFLAALGAGLLAAG |
| PH1219      | (210aa of IMPCT)   | - |  |  | RE        | AERLRMR   | DQGRK     | TRD      | CGPV       | SRHLNRP   | VSRWLSR     | ---       | YLVRTSV  | TPNQ               |
| PAB2433     | (208aa of IMPCT)   | - |  |  | KK        | AKKLI     | VAHSV     | KVGV     | DGFI       | SRYLNR    | KKVST       | WISS      | ---      | HLVDH              |
| PF1058      | (209aa of IMPCT)   | - |  |  | KK        | AKKLI     | VYSSV     | KVGV     | DGFI       | SRYLNR    | KKVST       | WISS      | ---      | LLVHVT             |
| TK2279      | (214aa of IMPCT)   | - |  |  | KR        | ARMLVR    | TAVK      | TG       | DGFI       | SRHLNRRIS | STRVSE      | ---       | LLVEK    |                    |
| AF0263      | (208aa of IMPCT)   | - |  |  | R         | ANRALV    | SA-AV     | KSGD     | CGFI       | SRKINRK   | IS          | TRISA     | ---      | AIVNK              |
| aq_1367     | (216aa of IMPCT)   | - |  |  | E         | KAKYL     | VKTA      | IKGV     | DGFI       | SRNLNR    | KKVST       | TRISP     | ---      | YLVDK              |
| AF2299      | (131aa of ?domain) | - |  |  | S         | SLIKAK    | RTGL      | KPAY     | DGWI       | AREIN     | RKVS        | LRISR     | ---      | LLADT              |
| Saro3075    | (106aa of ?domain) | - |  |  | L         | EAGRA     | ILRGT     | AKPT     | DCIV       | SRHVNR    | PLS         | QAIST     | ---      | VALR               |
| PGSA_ECOLI  |                    |   |  |  |           |           |           |          |            |           |             |           |          | QFNIP              |
| PGSA_BACSU  |                    |   |  |  |           |           |           |          |            |           |             |           |          | ---                |
| PSS_BACSU   |                    |   |  |  |           |           |           |          |            |           |             |           |          | ---                |
| PSS_YEAST   |                    |   |  |  |           |           |           |          |            |           |             |           |          | ---                |
| CDIPT_HUMAN |                    |   |  |  |           |           |           |          |            |           |             |           |          | ---                |
| PIS_YEAST   |                    |   |  |  |           |           |           |          |            |           |             |           |          | ---                |
| PIS1_ARATH  |                    |   |  |  |           |           |           |          |            |           |             |           |          | ---                |

**DIPS signature**

|             |      |        |        |      |      |       |     |       |     |     |      |     |     |       |
|-------------|------|--------|--------|------|------|-------|-----|-------|-----|-----|------|-----|-----|-------|
| TM_DIPS     | LPW  | IAGIL  | VQVS   | S    | DG   | DGe   | AR  | s     | G   | D   | Dr   | d   |     | sy    |
| Tnea_DIPS   | MPW  | LAAIFI | IQIS   | S    | ILD  | GVDGE | IAR | ARNMS | SNW | GAF | DTML | DRF | VDI | ILAVL |
| APE1516     | QLLV | GGLLV  | QLS    | S    | VL   | DGVDG | I   | VAR   | ARL | RAA | SKAG | GF  | DL  | TML   |
| GZ13E1_32   | QAI  | IGALL  | IQIS   | S    | VL   | DG    | DGE | I     | AR  | LKH | MQS  | SSL | DG  | FV    |
| Rxy1021259  | RLR  | LGGAL  | VQLAS  | S    | IV   | DG    | DGE | I     | AR  | L   | KHS  | QSE | F   | G     |
| 17H9-22     | ALA  | AGV    | LAQLAS | S    | IV   | DG    | DGE | I     | AR  | L   | KHS  | QSE | F   | G     |
| PH1219      | -I   | PLAG   | L      | YQIS | S    | IL    | DG  | DGE   | I   | AR  | ARM  | QTS | K   | F     |
| PAB2433     | -V   | PI     | AGIL   | YQVS | S    | IL    | DG  | DGE   | I   | AR  | ARM  | QTS | K   | F     |
| PF1058      | -V   | PL     | AA     | L    | YQIS | S     | IF  | D     | G   | DGE | I    | AR  | ARM | QTS   |
| TK2279      | -L   | PL     | AG     | L    | YQIS | S     | IL  | DG    | DGE | I   | AR   | ARM | QTS | K     |
| AF0263      | -I   | PL     | AG     | L    | YQIS | S     | IL  | DG    | DGE | I   | AR   | ARM | QTS | K     |
| aq_1367     | -P   | AL     | G      | L    | L    | YQIS  | S   | ML    | D   | G   | DGE  | I   | AR  | ARM   |
| AF2299      | T    | L      | L      | A    | G    | V     | I   | Q     | L   | H   | S    | A   | I   | D     |
| Saro3075    | G    | L      | V      | A    | G    | A     | L   | L     | F   | Q   | A    | A   | S   | I     |
| PGSA_ECOLI  | ---  | F      | A      | A    | A    | L     | F   | Q     | A   | A   | V    | A   | A   | V     |
| PGSA_BACSU  | ---  | G      | I      | L    | F    | I     | A   | S     | T   | D   | W    | V   | D   | G     |
| PSS_BACSU   | -I   | H      | S      | A    | V    | L     | F   | I     | F   | T   | G    | M   | F   | L     |
| PSS_YEAST   | Y    | Q      | R      | A    | H    | F     | L   | L     | G   | M   | C    | F   | D   | L     |
| CDIPT_HUMAN | -P   | L      | T      | A    | S    | S     | F   | L     | L   | S   | G    | L   | L   | D     |
| PIS_YEAST   | -P   | T      | A      | F    | T    | W     | L   | Y     | S   | T   | S    | C   | L   | L     |
| PIS1_ARATH  | -K   | P      | L      | F    | S    | V     | L   | Y     | F   | F   | S    | F   | C   | C     |

**Family signature** DxxDGxxARxxNxxxxGxxxxDxxD

**DIPS signature**

|             |     |   |   |   |   |   |   |   |   |   |   |   |   |   |   |   |   |   |    |   |    |    |   |   |     |
|-------------|-----|---|---|---|---|---|---|---|---|---|---|---|---|---|---|---|---|---|----|---|----|----|---|---|-----|
| TM_DIPS     | HSV | G | K | V | F | G | T | H | P | A | L | V | G | K | L | S | G | F | A  | S | -- | R  | D | R |     |
| Tnea_DIPS   | HSV | G | K | V | F | G | T | H | P | A | L | V | G | K | L | S | G | F | A  | S | -- | R  | D | R |     |
| APE1516     | H   | T | R | G | E | R | D | A | G | V | H | P | S | L | V | G | P | L | S  | L | S  | -- | R | D | R   |
| GZ13E1_32   | S   | A | K | S | I | A | N | F | G | Y | K | G | L | I | A | A | G | R | -- | R | D  | R  | L | L | L   |
| Rxy1021259  | R   | A | R | W | E | A | L | G | R | M | P | S | - | R | F | T | G | L | A  | T | -- | R  | D | R |     |
| 17H9-22     | A   | D | K | Y | D | G | L | M | A | R | R | L | S | - | G | A | S | F | R  | L | G  | -- | R | D | R   |
| PH1219      | T   | E | R | F | R | G | A | C | A | D | A | Y | K | V | P | A | L | R | K  | I | P  | G  | R | D | E   |
| PAB2433     | T   | E | R | F | R | G | A | C | A | D | A | Y | K | V | P | A | L | R | K  | I | P  | G  | R | D | E   |
| PF1058      | T   | E | R | F | R | G | A | C | A | D | A | Y | K | V | P | A | L | R | K  | I | P  | G  | R | D | E   |
| TK2279      | T   | E | R | F | R | G | A | C | A | D | A | Y | K | V | P | A | L | R | K  | I | P  | G  | R | D | E   |
| AF0263      | S   | E | K | Y | K | A | E | F | G | E | S | I | F | G | K | R | V | L | I  | P | G  | R  | D | E | R   |
| aq_1367     | T   | E | R | Y | K | A | G | A | C | A | D | A | Y | K | V | P | A | L | R  | K | I  | P  | G | R | D   |
| AF2299      | G   | D | K | F | V | A | A | M | R | T | Y | S | P | E | G | F | A | I | P  | T | -- | R  | D | R | L   |
| Saro3075    | R   | A | K | G | A | A | D | R | T | G | S | P | V | A | G | N | S | P | S  | G | G  | E  | T | R | D   |
| PGSA_ECOLI  | L   | R | E | W | M | A | E | L | K | R | S | S | V | A | S | W | I | G | K  | T | T  | A  | Q | M | L   |
| PGSA_BACSU  | T   | G | E | V | S | R | L | L | H | L | L | H | N | L | P | F | E | L | V  | S | P  | F  | A | D | --- |
| PSS_BACSU   | F   | N | I | E | Q | S | K | L | P | T | F | I | G | M | P | I | F | F | A  | G | M  | C  | L | V | I   |
| PSS_YEAST   | F   | N | V | T | V | A | Q | L | P | K | D | S | S | T | G | K | S | K | F  | E | G  | L  | P | M | P   |
| CDIPT_HUMAN | I   | D | L | S | G | N | P | V | L | R | I | Y | T | S | R | P | A | L | T  | C | A  | G  | N | E | L   |
| PIS_YEAST   | V   | E | G | E | S | R | L | L | H | L | Y | T | R | D | V | L | T | I | C  | A | F  | N  | E | L | F   |
| PIS1_ARATH  | V   | K | D | S | T | S | W | L | F | R | L | Y | G | N | R | I | F | M | C  | Y | C  | C  | S | C |     |

(C) Hydropathy profile of the putative DIP synthase DipB from *T. maritima*.

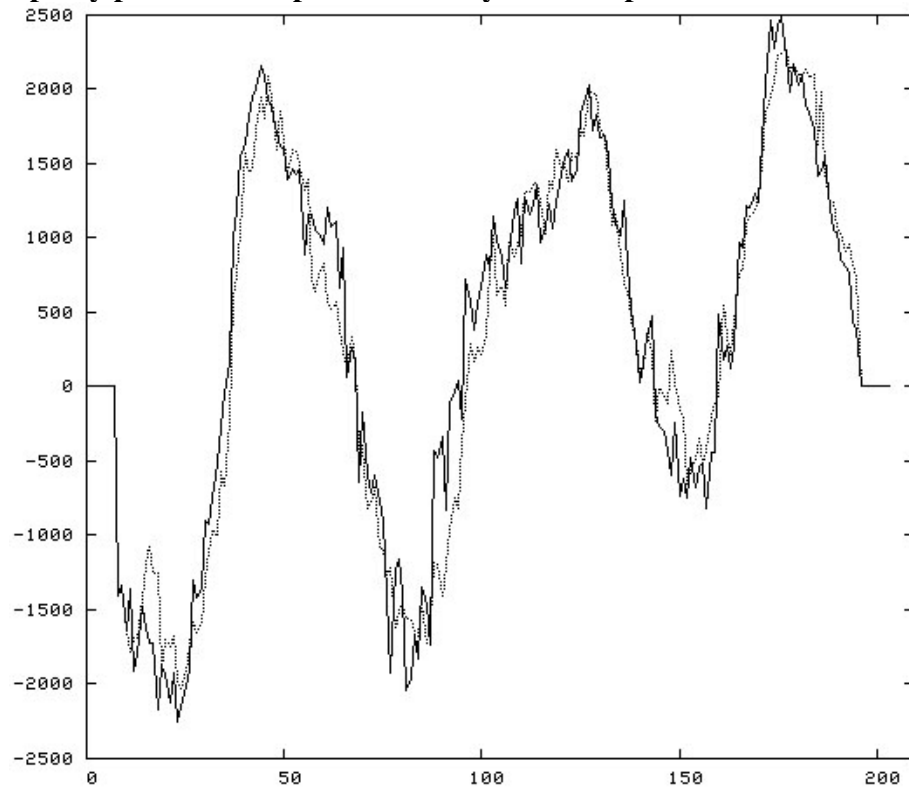

Supplement: pnas_0609279104_2.pdf [file pnas_0609279104_2.pdf]
