# Supplementary material
Source: PubMed Central journal article supplement (PMC1838593)

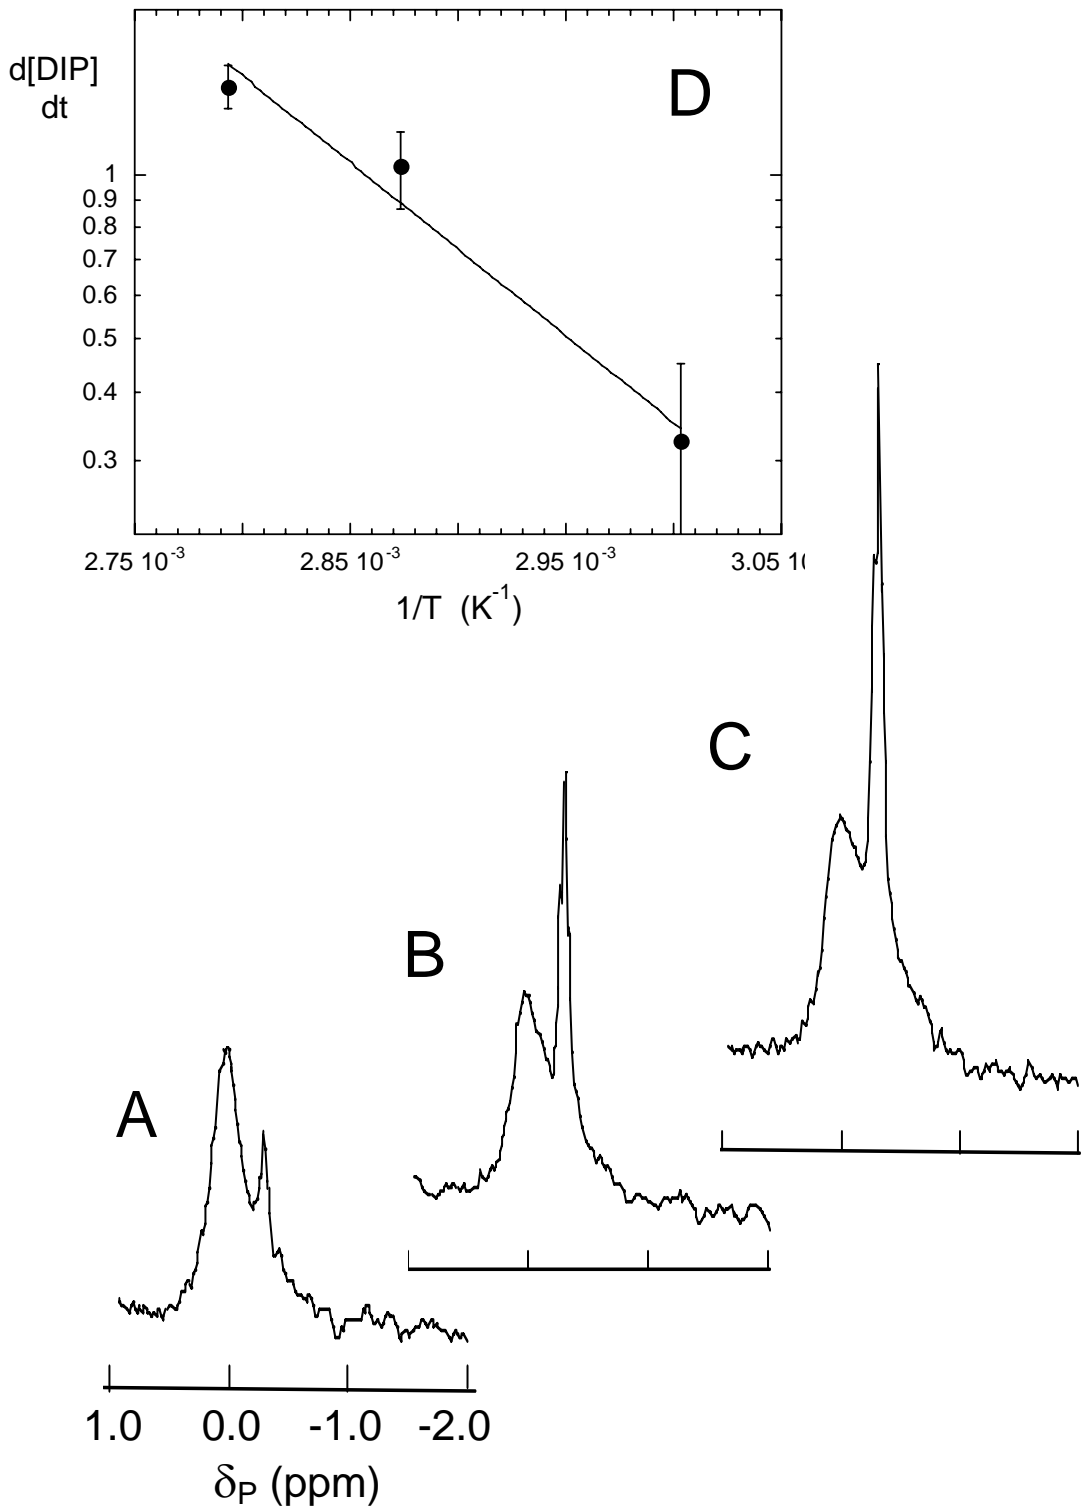

Supplement: pnas_0609279104_3.pdf [file pnas_0609279104_3.pdf]
